# Supplementary material for: Electrochemical properties of a thermally expanded magnetic graphene composite with a conductive polymer
Source: Royal Society of Chemistry journal article supplement (doi:10.1039/c6cp00311g), 2016-01-01
Supplement: c6cp00311g1.pdf [file c6cp00311g1.pdf]

## Supporting Information

### Electrochemical Properties of Thermally Expanded Magnetic Graphene

#### Composite with Conductive Polymer

Mahmoud M. M. Ahmed,<sup>a</sup> Toyoko Imae<sup>\*a,b</sup>

<sup>a</sup>Graduate Institute of Applied Science and Technology, National Taiwan University of Science and Technology, 43 Section 4, Keelung Road, Taipei 10607, Taiwan ROC.

<sup>b</sup>Department of Chemical Engineering, National Taiwan University of Science and Technology, 43 Section 4, Keelung Road, Taipei 10607, Taiwan ROC.

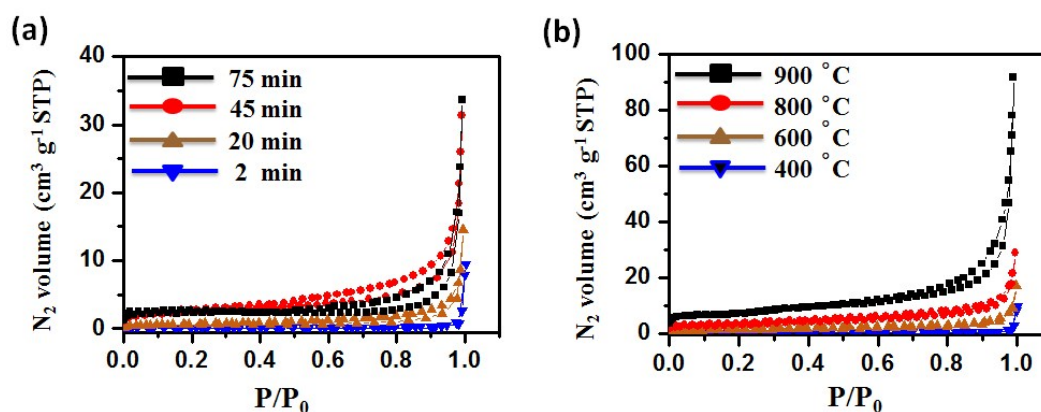

**Figure S1.** Adsorption/desorption N<sub>2</sub> isotherms of magnetic graphene. (a) Treated for 2, 20, 45 and 75 min at 400 °C . (b) Treated for 2 min at 400, 600, 800 and 900 °C.

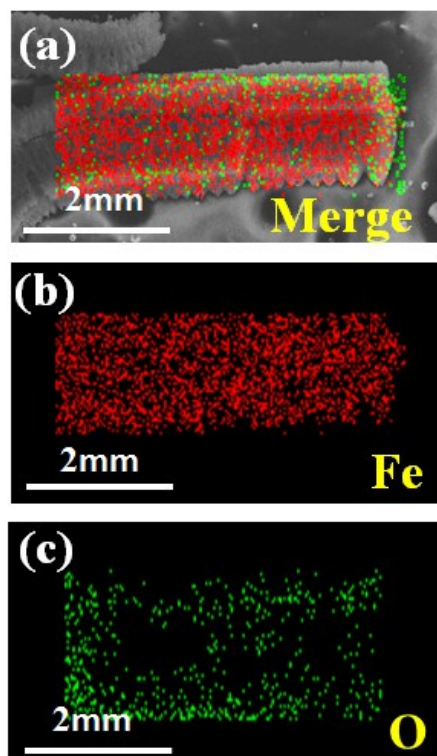

**Figure S2.** Distribution maps of Fe and O atoms on a piece of magnetic graphene treated for 2 min at 900 °C. (a) Merge, (b) Fe, and (c) O.

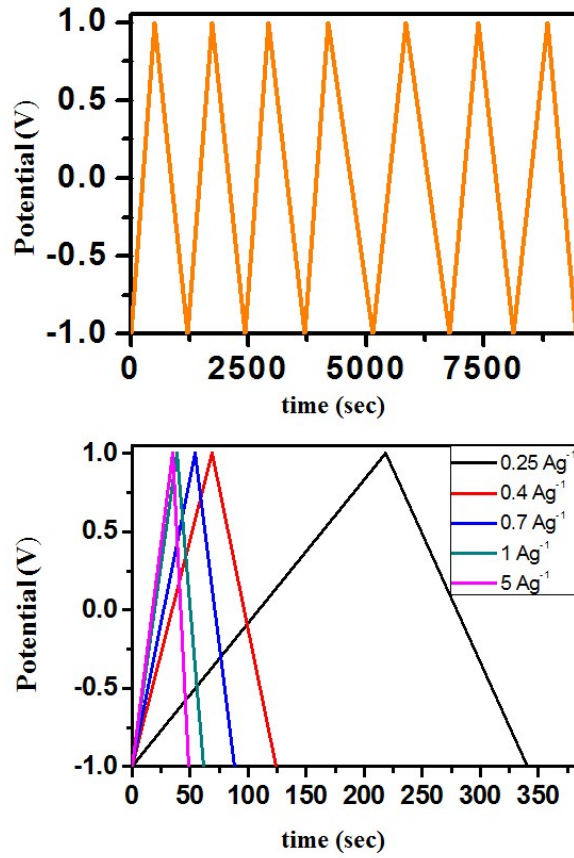

**Figure S3.** Charge-discharge curves for magnetic graphene treated for 75 min at 400 °C. (a) At current density of  $0.1 \text{ Ag}^{-1}$ . (b) At different current densities from  $0.25 \text{ Ag}^{-1}$  to  $5 \text{ Ag}^{-1}$ .

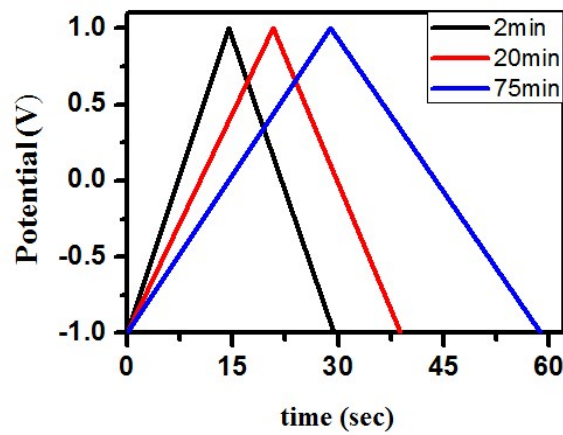

**Figure S4.** Charge-discharge curves at current density of  $1.0 \text{ Ag}^{-1}$  for magnetic graphene treated for 2, 20 and 75 min at 400 °C .

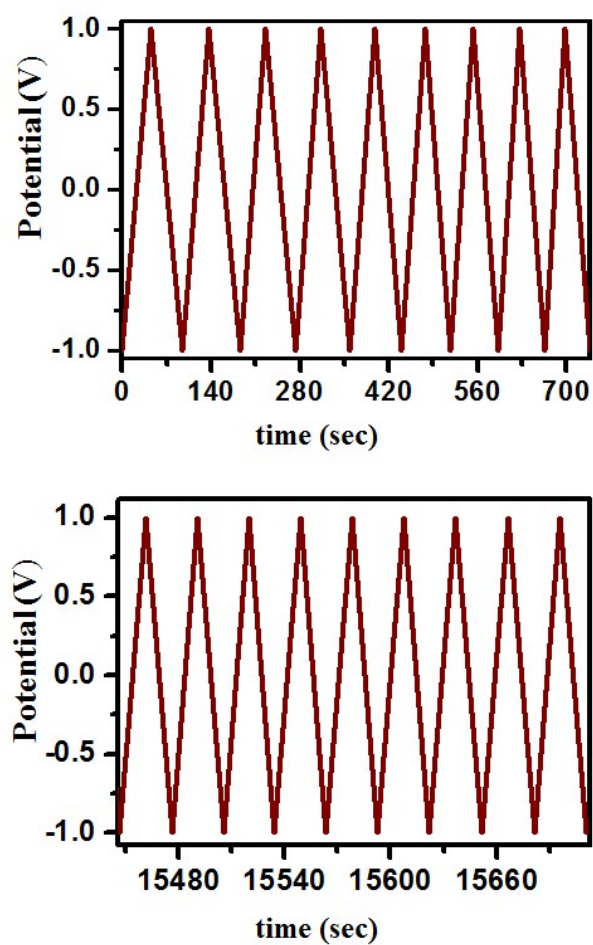

**Figure S5.** Charge-discharge curves for magnetic graphene treated for 2 min at 800 °C at current density of 1.0 Ag<sup>-1</sup>. (a) First and (b) the last 9 cycles in total 700 cycles.

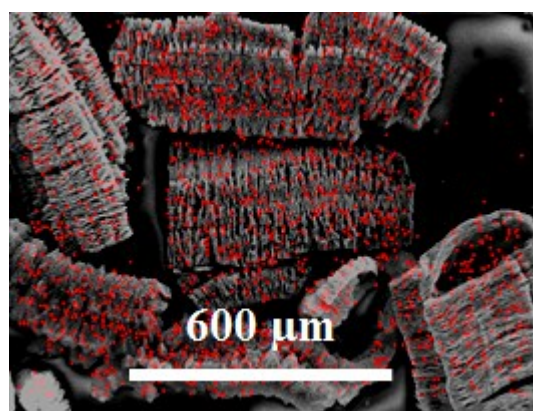

**Figure S6.** A distribution map of Fe on pieces of magnetic graphene/PANI composite.

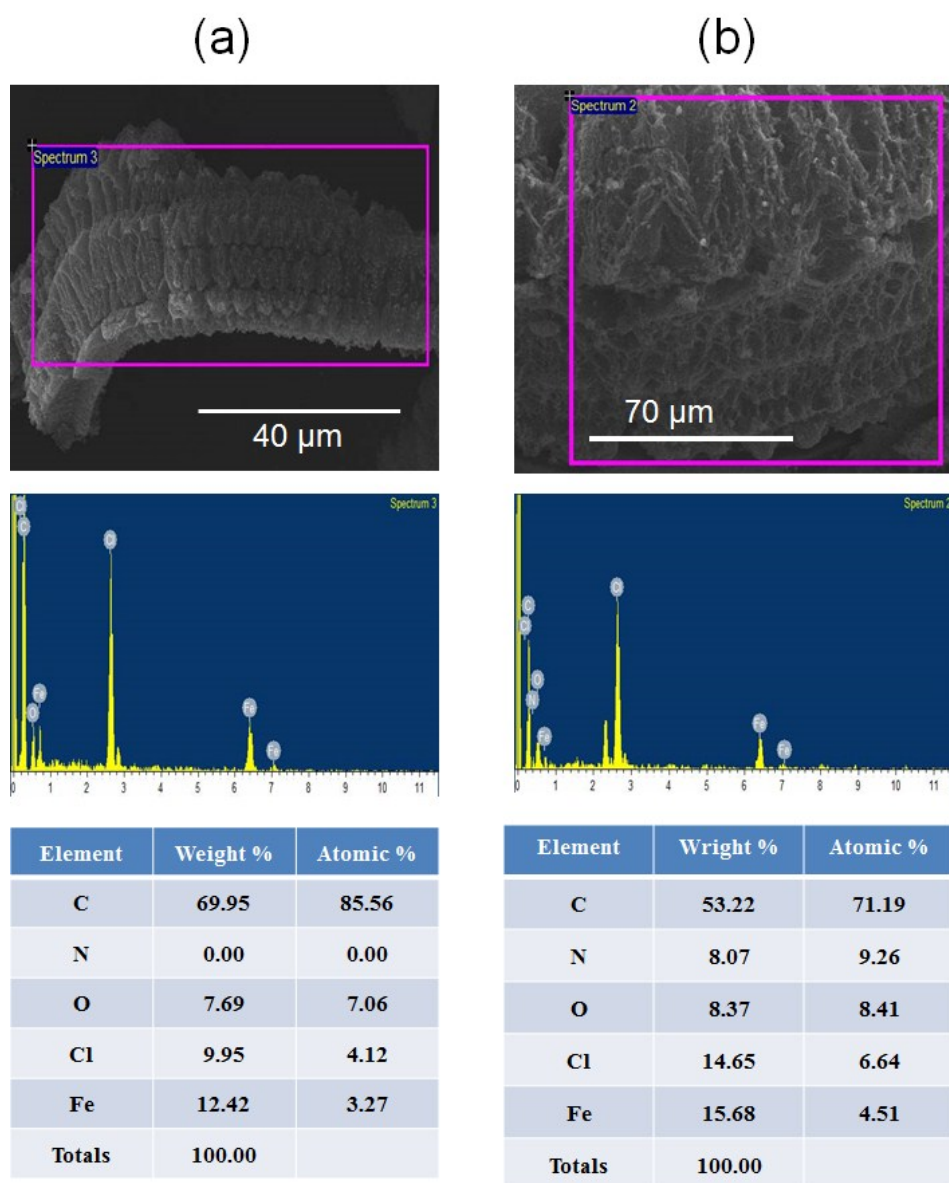

**Figure S7.** Focused ion beam images and elemental analyses of EDX. (a) Magnetic graphene treated for 2 min at 900 °C. (b) Magnetic graphene/PANI composite.
